# Supplementary material for: Depletion of the LINC complex disrupts cytoskeleton dynamics and meiotic resumption in mouse oocytes
Source: PubMed Central journal article supplement (PMC4740751; doi:10.1038/srep20408), 2016-02-04
Supplement: srep20408-s1.pdf [file srep20408-s1.pdf]

Supplementary figures

# **Depletion of LINC complex disrupts cytoskeleton dynamics and meiotic resumption in mouse oocytes**

Yibo Luo, In-Won Lee, Yu-Jin Jo, Suk Namgoong and Nam-Hyung Kim\*  
Department of Animal Science, Chungbuk National University, Cheongju, Korea

\*Correspondence: Nam-Hyung Kim.

Tel: +82-43-261-2546

Fax: +82-43-272-8853

E-mail: [nhkim@chungbuk.ac.kr](mailto:nhkim@chungbuk.ac.kr)

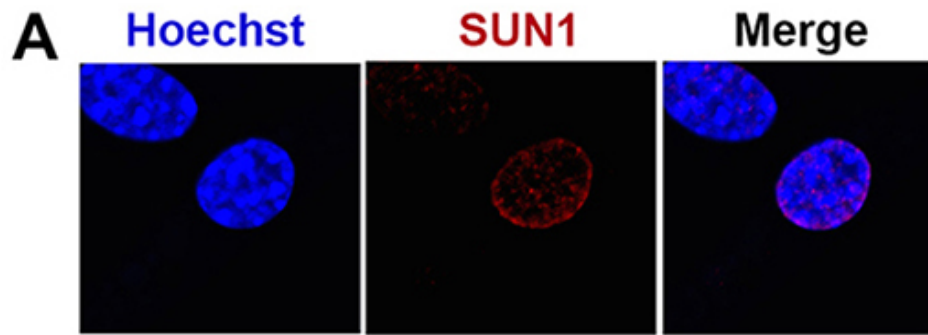

Supplementary  
Figure S1

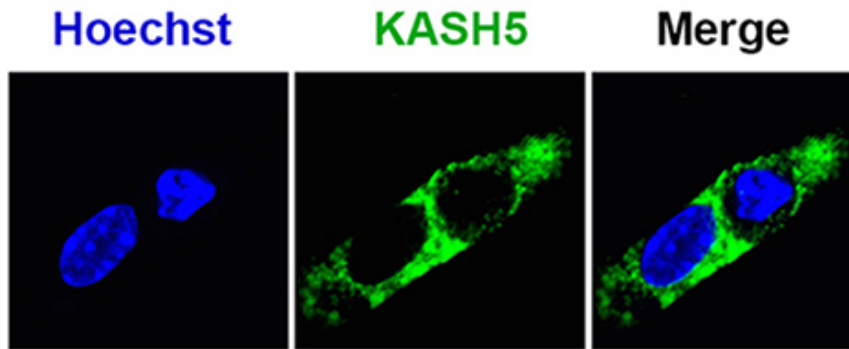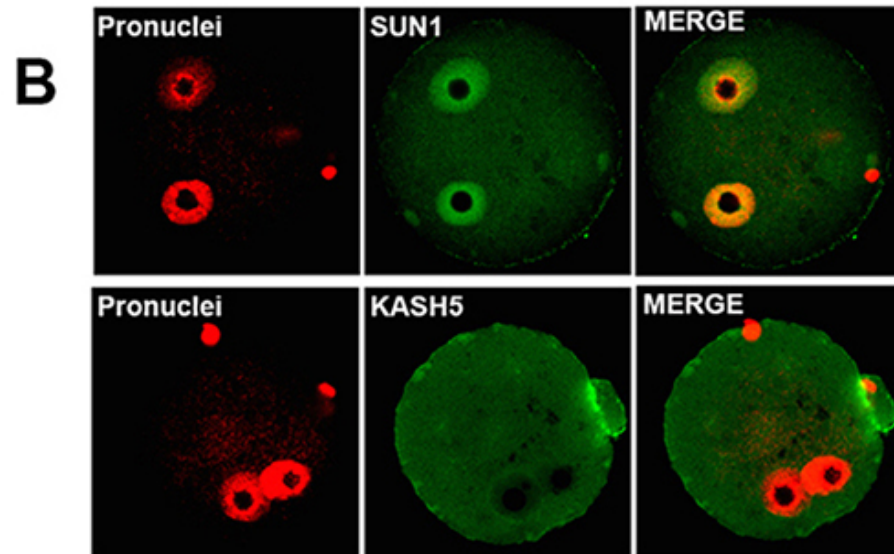

**Figure S1.** Localization of SUN1 and KASH5 in (A) mouse embryonic fibroblasts (MEF) and (B) zygotes at pronuclei stage. Bar=20 $\mu$ m.

Supplementary  
Figure S2

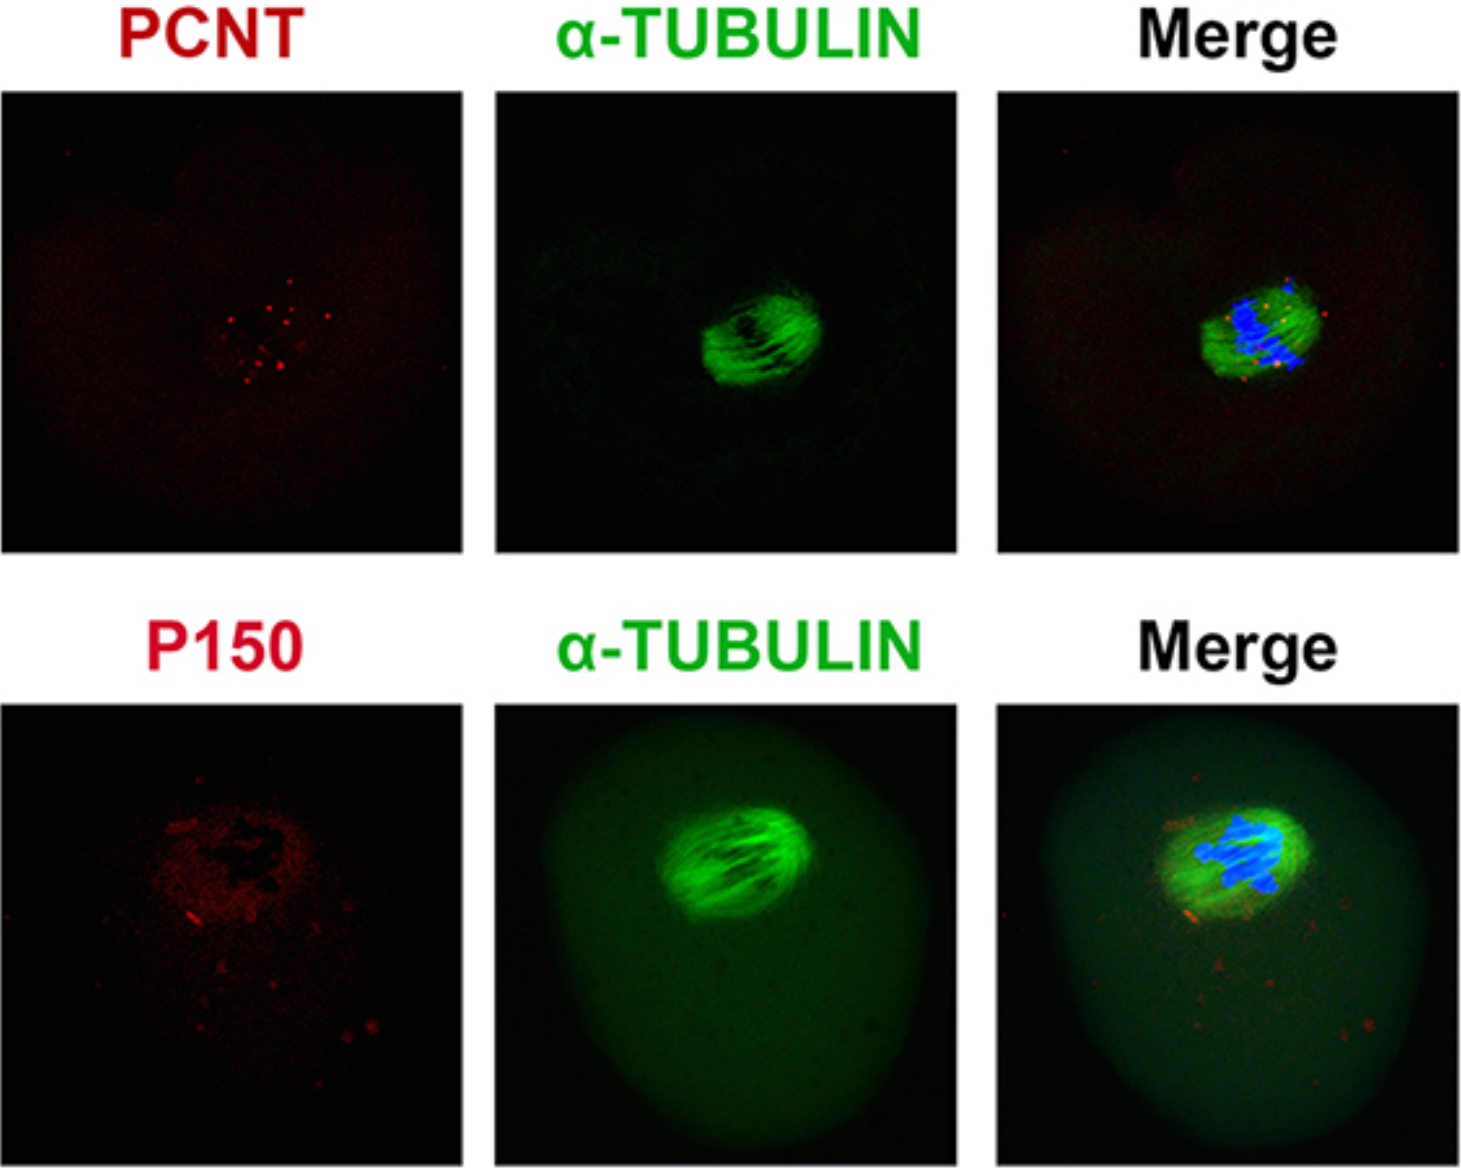

**Figure S2.** Localization of (A) PCNT and (B) P150 at MI stage. PCNT and P150 both show dot signals around the spindle at MI stage. Bar=20 $\mu$ m.

Supplementary  
Figure S3

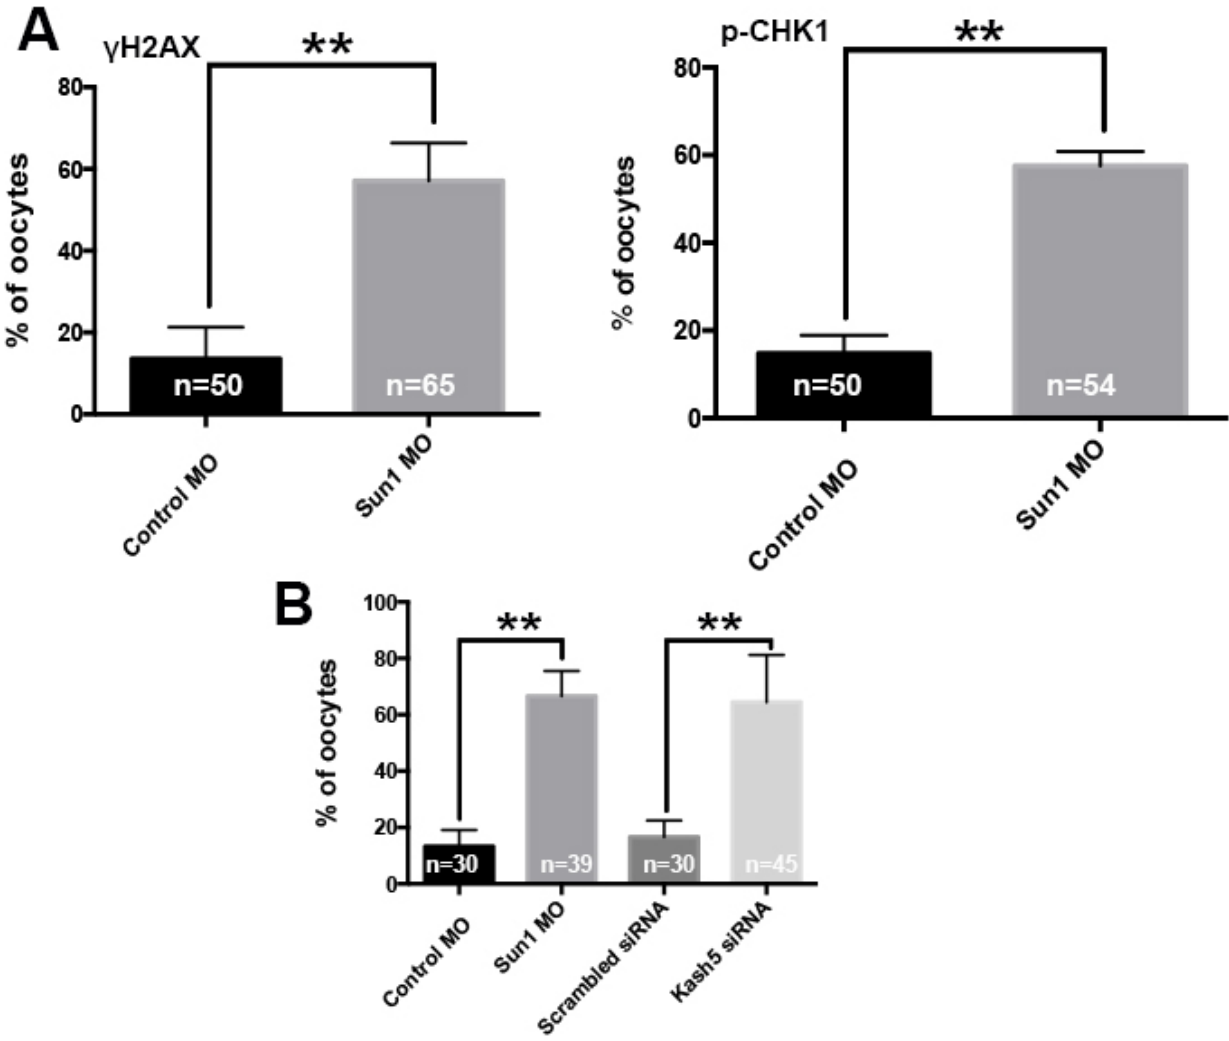

Figure S3. A, The statistical results of oocytes with positive  $\gamma$ H2AX and p-CHK1 signals. B, The statistical results of oocytes with migrated spindle after cultured for 7h. \*\* means  $p < 0.001$ .
